# Supplementary material for: Sequential structural transitions with distinct dielectric responses in a layered perovskite organic–inorganic hybrid material: [C4H9N]2[PbBr4]
Source: Royal Society of Chemistry journal article supplement (doi:10.1039/c5dt03277f), 2015-01-01
Supplement: c5dt03277f1.pdf [file c5dt03277f1.pdf]

## Supporting Information

### Sequential structural transitions with distinct dielectric responses in a layered perovskite organic-inorganic hybrid material: $[\text{C}_4\text{H}_9\text{N}]_2[\text{PbBr}_4]\dagger$

Zhong-Xia Wang, Wei-Qiang Liao, Heng-Yun Ye, and Yi Zhang\*

*Ordered Matter Science Research Center, College of Chemistry and Chemical Engineering, Southeast University, Nanjing 211189, PR China*

\*E-mail: yizhang1980@seu.edu.cn.

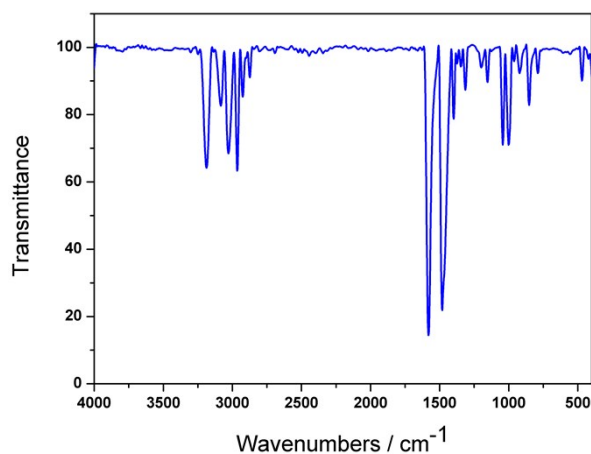

**Fig. S1** Infrared (IR) spectra of solid **1** in KBr pellet recorded on a Shimadzu model IR-60 spectrometer at room temperature

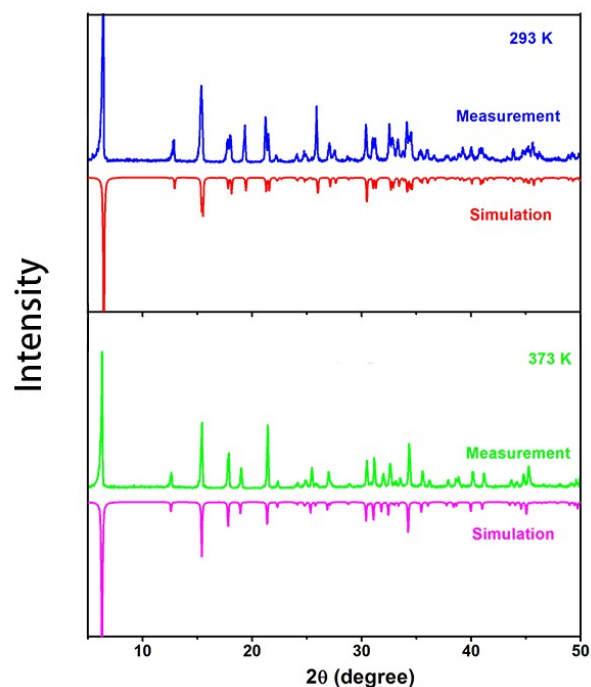

**Fig. S2** Experimental powder diffraction (XRPD) patterns matching very well with the simulated ones in terms of the crystal structures for different phases

**Table S1.** Selected bond lengths [Å] and angles [°] for **1<sup>a</sup>** at 293, and 373 K

|       |                                          |            |                                           |            |
|-------|------------------------------------------|------------|-------------------------------------------|------------|
| 293 K | Pb1-Br1                                  | 3.018(9)   | Pb1-Br2                                   | 2.990(14)  |
|       | Br2-Pb1-Br2 <sup>i</sup>                 | 180.00(14) | Br2-Pb1-Br1 <sup>ii</sup>                 | 89.30(4)   |
|       | Br2 <sup>i</sup> -Pb1-Br1 <sup>ii</sup>  | 90.70(4)   | Br2-Pb1-Br1 <sup>iii</sup>                | 90.70(4)   |
|       | Br2 <sup>i</sup> -Pb1-Br1 <sup>iii</sup> | 89.30(4)   | Br1 <sup>ii</sup> -Pb1-Br1 <sup>iii</sup> | 180.00(3)  |
|       | Br2-Pb1-Br1                              | 85.99(3)   | Br2 <sup>i</sup> -Pb1-Br1                 | 94.01(3)   |
|       | Br1 <sup>ii</sup> -Pb1-Br1               | 90.66(16)  | Br1 <sup>iii</sup> -Pb1-Br1               | 89.34(16)  |
|       | Br2-Pb1-Br1 <sup>i</sup>                 | 94.01(3)   | Br2 <sup>i</sup> -Pb1-Br1 <sup>i</sup>    | 85.99(3)   |
|       | Br1 <sup>ii</sup> -Pb1-Br1 <sup>i</sup>  | 89.34(16)  | Br1 <sup>iii</sup> -Pb1-Br1 <sup>i</sup>  | 90.66(16)  |
| 373 K | Br1-Pb1-Br1 <sup>i</sup>                 | 180.00(2)  | Pb1 <sup>iv</sup> -Br1-Pb1                | 153.22(3)  |
|       | Pb1-Br1                                  | 3.021(2)   | Pb1-Br2                                   | 2.983(4)   |
|       | Br2-Pb1-Br2 <sup>v</sup>                 | 180.00(14) | Br2 <sup>v</sup> -Pb1-Br1 <sup>vi</sup>   | 90.00(7)   |
|       | Br2-Pb1-Br1 <sup>vi</sup>                | 90.00(7)   | Br2 <sup>v</sup> -Pb1-Br1 <sup>vii</sup>  | 90.00(7)   |
|       | Br2-Pb1-Br1 <sup>vii</sup>               | 90.00(7)   | Br1 <sup>vi</sup> -Pb1-Br1 <sup>vii</sup> | 180.00(14) |

|                                         |            |                                          |           |
|-----------------------------------------|------------|------------------------------------------|-----------|
| Br2 <sup>v</sup> -Pb1-Br1               | 90.00(7)   | Br2-Pb1-Br1                              | 90.00(7)  |
| Br1 <sup>vi</sup> -Pb1-Br1              | 89.97(7)   | Br1 <sup>vii</sup> -Pb1-Br1              | 90.03(7)  |
| Br2 <sup>v</sup> -Pb1-Br1 <sup>v</sup>  | 90.00(7)   | Br2-Pb1-Br1 <sup>v</sup>                 | 90.00(7)  |
| Br1 <sup>vi</sup> -Pb1-Br1 <sup>v</sup> | 90.03(7)   | Br1 <sup>vii</sup> -Pb1-Br1 <sup>v</sup> | 89.97(7)  |
| Br1-Pb1-Br1 <sup>v</sup>                | 180.00(14) | Pb1 <sup>viii</sup> -Br1-Pb1             | 153.16(6) |

<sup>a</sup>Symmetry codes: (i) -x,-y,-z (ii) -x,y-1/2,-z+1/2 (iii) x,-y+1/2,z-1/2 (iv) -x,y+1/2,-z+1/2 (v) -x,-y,-z (vi) -x,y-1/2,-z+1/2 (vii) x,-y+1/2,z-1/2 (viii) -x,y+1/2,-z+1/2

**Table S2.** Hydrogen-Bond Geometry (Å, deg) for N-H⋯Br interactions at 293, and 373 K in **1**<sup>b</sup>

|       | D-H⋯A                     | H⋯A  | D⋯A     | D-H⋯A |
|-------|---------------------------|------|---------|-------|
| 293 K | N1-H1D⋯Br1 <sup>ii</sup>  | 2.65 | 3.49(7) | 157.9 |
|       | N1-H1E⋯Br1 <sup>i</sup>   | 2.69 | 3.45(7) | 144.9 |
|       | N1-H1E⋯Br2 <sup>iii</sup> | 2.93 | 3.44(6) | 117.8 |
|       | N1-H1F⋯Br2 <sup>ii</sup>  | 3.00 | 3.43(8) | 111.5 |
| 373 K | N1-H1D⋯Br1 <sup>v</sup>   | 2.69 | 3.48(3) | 146.6 |
|       | N1-H1D⋯Br1 <sup>iv</sup>  | 3.03 | 3.44(3) | 110.5 |
|       | N1-H1E⋯Br1                | 2.71 | 3.56(2) | 157.9 |
|       | N1-H1F⋯Br1 <sup>vi</sup>  | 2.75 | 3.60(2) | 158.7 |

<sup>b</sup>Symmetry codes: (i) -x,y+1/2,-z+1/2 (ii) x,-y+3/2,z+1/2 (iii) x,y+1,z (iv) x,y-1/2,-z-1/2 (v) -x+1,-y+1/2,z+1/2 (vi) x,y+1/2,-z-1/2
